# Supplementary material
Source: publisher figshare collection journal article supplement (https://acs.figshare.com/ndownloader/files/10482142)
Supplement: Supplementary file 2 [file 10482142]

**Permission Request Form for Use of *Individual and/or Group Photos*  
in *ACS LiveSlides* from Copyright Owners/Publishers/Photographers  
Other Than ACS**

Date: 18/01/18

To: Mr. Suman Mandal  
Publisher's/Copyright Owner's Contact Information  
SRF, CAM, IACS  
2A & 2B Raja S.C. Mullick  
Road, Kolkata - 700032, India

Publisher's/Copyright Owner's Email Address  
camsm4@iacs.res.in

From: Prof. Nikhil Ranjan Jana  
Your Name and Complete Mailing Address  
CAM, IACS  
2A & 2B Raja S.C. Mullick Road  
Kolkata - 700032, India

Your Phone Number Including Country and City Codes  
+919933971762

Your Email Address  
camnrj@iacs.res.in

Your Specific Deadline Date 19/01/18

I am preparing an *ACS LiveSlides* entitled: Nitrogen and Fluorine Codoped, Colloidal TiO<sub>2</sub> Nanoparticle: Tunable Doping, Large Red-Shifted Band Edge, Visible Light Induced Photocatalysis, and Cell Death

to appear with ACS APPLIED MATERIALS & INTERFACES (DOI: 10.1021/acsami.7b14025)

Title of ACS Publication and DOI

which is published by the American Chemical Society, a not-for-profit membership society and a STM signatory.

I would appreciate your permission to use the following material in all formats including but not limited to print, microform, electronic, and/or CD-ROM from the following reference:

**Individual Photographs of the Following Individuals:**

1. Mr. Aritra Biswas
2. Dr. Atanu Chakraborty
3. Prof. Nikhil Ranjan Jana

**Collective Photograph (s) representing the following groups:**

\_\_\_\_\_

\_\_\_\_\_

\_\_\_\_\_

If you, the photographer, have a required **credit line**, please include it below: no, not required.

\_\_\_\_\_

\_\_\_\_\_

For your convenience, you may sign and date the bottom of this letter to indicate your agreement. Please return this form to me at the above email address, by the above **deadline date** (if given above). Thank you.

Agreed: Suman Mandal  
Publisher's/Copyright Owner's Signature or Stamp

Date: 18/1/18  
Date

**SIGN HERE**

Submit completed and signed form with your signed *ACS LiveSlides* Video Release. 7/25/16  
Prof. Nikhil Ranjan Jana  
उन्नत पदार्थ केंद्र / Centre for Advanced Materials  
इण्डियन एसोसिएशन फॉर / Indian Association for  
द कल्चिवेशन ऑफ साइन्स / the Cultivation of Science  
यादवपुर, कोलकाता - 700032 / Jadavpur, Kol - 700032
