# Supplementary material
Source: publisher figshare collection journal article supplement (https://acs.figshare.com/ndownloader/files/10482142)
Supplement: Supplementary file 3 [file 10482142]

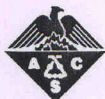

## AMERICAN CHEMICAL SOCIETY

MODEL RELEASE FORM for ACS LiveSlides  
(Person in Photograph)

This form cannot be altered. For questions, please contact [ACSPubsMultimedia@acs.org](mailto:ACSPubsMultimedia@acs.org)

Requesting Permission:

Date: 18/01/18

To: Mr. Aritra Biswas  
SRF, CAM, IACS  
2A & 2B Raja S.C. Mullick Road  
Kolkata - 700032, India

Return to: Prof. Nikhil Ranjan Jana  
CAM, IACS  
2A & 2B Raja S.C. Mullick  
Road Kolkata - 700032  
, India

I am preparing material for Nitrogen and Fluorine Codoped, Colloidal TiO<sub>2</sub>  
Nanoparticle: Tunable Doping, Large Red-Shifted Band Edge,  
Visible Light Induced Photocatalysis, and Cell Death  
(title of ACS LifeSlide)

to be published by the American Chemical Society, a not-for-profit membership society.

I would like your permission to include the enclosed photograph(s) in which you appear. To indicate your permission, please sign and date the statement below and return this form to me.

I appreciate your prompt response.

Signed: 

प्रो. निखिल रंजन जाना / Prof. Nikhil Ranjan Jana  
उन्नत-पर्याय-केंद्र / Centre for Advanced Materials  
Grant of Permission इण्डियन एसोसिएशन फॉर / Indian Association for  
द कल्चिवेशन ऑफ साइन्स / the Cultivation of Science  
यादवपुर, कोलकाता - 700032 / Jadavpur, KOL - 700032

I hereby grant to the American Chemical Society royalty-free permission, including nonexclusive world rights in all languages, to reproduce in all formats including but not limited to print, microform, electronic, and/or CD-ROM, to reproduce and include my likeness as shown in the attached photocopy(ies) of photograph(s) for the above-mentioned publication.

Agree to and accepted:

**SIGN HERE**

Signature Aritra Biswas Date: 18/01/18

Check one of the blanks:

☒ I am the person in the photo

☐ I am the authorized agent for the person in the photo (for group photographs, one person, in the photograph, needs to sign on behalf of the group)

Submit completed and signed form with your signed ACS Journals LifeSlides Video Release.

7/19/16



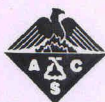

# AMERICAN CHEMICAL SOCIETY

MODEL RELEASE FORM for ACS LiveSlides  
(Person in Photograph)

This form cannot be altered. For questions, please contact [ACSPubsMultimedia@acs.org](mailto:ACSPubsMultimedia@acs.org)

Requesting Permission:

Date: 18/01/18

To: Dr. Atanu Chakraborty  
RA-I, CAM, IACS  
2A & 2B Raja S.C. Mullick Road  
Kolkata - 700032, India

Return to: Prof. Nikhil Ranjan Jana  
CAM, IACS  
2A & 2B Raja S.C. Mullick  
Road Kolkata - 700032  
India

I am preparing material for Nitrogen and fluorine Codoped, Colloidal  $TiO_2$  Nanoparticle  
Tunable Doping, Large Red-Shifted Band Edge, Visible Light Induced  
Photocatalysis, and Cell Death  
(title of ACS LifeSlide)

to be published by the American Chemical Society, a not-for-profit membership society.

I would like your permission to include the enclosed photograph(s) in which you appear. To indicate your permission, please sign and date the statement below and return this form to me.

I appreciate your prompt response.

Signed:   
Prof. Nikhil Ranjan Jana  
उन्नत पदार्थ केंद्र / Centre for Advanced Materials  
इण्डियन एसोसिएशन फॉर / Indian Association for  
द कल्चिवेशन ऑफ साइंस / the Cultivation of Science  
जादवपुर, कोलकाता - 700032 / Jadavpur, Kol - 700032

Grant of Permission

I hereby grant to the American Chemical Society royalty-free permission, including nonexclusive world rights in all languages, to reproduce in all formats including but not limited to print, microform, electronic, and/or CD-ROM, to reproduce and include my likeness as shown in the attached photocopy(ies) of photograph(s) for the above-mentioned publication.

Agree to and accepted:

SIGN HERE

Signature Atanu Chakraborty Date: 18/1/18

Check one of the blanks:

☒ I am the person in the photo

☐ I am the authorized agent for the person in the photo (for group photographs, one person, in the photograph, needs to sign on behalf of the group)

Submit completed and signed form with your signed ACS Journals LifeSlides Video Release.

7/19/16



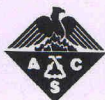

# AMERICAN CHEMICAL SOCIETY

## MODEL RELEASE FORM for ACS LiveSlides (Person in Photograph)

This form cannot be altered. For questions, please contact [ACSPubsMultimedia@acs.org](mailto:ACSPubsMultimedia@acs.org)

Requesting Permission:

Date: 18/01/18

To: Prof. Nikhil Ranjan Jana  
CAM, IACS  
2A&2B Raja S.C. Mullick  
Road Kolkata - 700032, India

Return to: Prof. Nikhil Ranjan Jana  
CAM, IACS  
2A&2B Raja S.C. Mullick  
Road, Kolkata - 700032, India

I am preparing material for Nitrogen and Fluorine Codoped, Colloidal TiO<sub>2</sub> Nanoparticle:  
Tunable Doping, Large Red-Shifted Band Edge, Visible Light Induced  
Photocatalysis, and Cell Death  
(title of ACS LifeSlide)

to be published by the American Chemical Society, a not-for-profit membership society.

I would like your permission to include the enclosed photograph(s) in which you appear. To indicate your permission, please sign and date the statement below and return this form to me.

I appreciate your prompt response.

Signed: \_\_\_\_\_

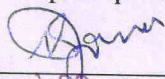  
प्रो. निखिल रंजन जाना / Prof. Nikhil Ranjan Jana  
उन्नत पदार्थ केंद्र / Centre for Advanced Materials  
इण्डियन एसोसिएशन फॉर / Indian Association for  
विज्ञान और साहित्य / the Cultivation of Science  
यादवपुर, कोलकाता - 700032 / Jadavpur, Kol - 700032

Grant of Permission:

I hereby grant to the American Chemical Society royalty-free permission, including nonexclusive world rights in all languages, to reproduce in all formats including but not limited to print, microform, electronic, and/or CD-ROM, to reproduce and include my likeness as shown in the attached photocopy(ies) of photograph(s) for the above-mentioned publication.

Agree to and accepted:

Signature \_\_\_\_\_

Date: 18/01/2018

SIGN HERE

Check one of the blanks:

☒ I am the person in the photo.  
☐ I am the authorized agent for the person in the photo (for group photographs, one person, in the photograph, needs to sign on behalf of the group)

Submit completed and signed form with your signed ACS Journals LifeSlides Video Release.

7/19/16
